# Supplementary material
Source: Springer Nature journal article supplement (https://www.springermedizin.de/resource/supplementary/12936_2013_3064_MOESM3_ESM.pdf/9545022)
Supplement: MOESM3 [file 9545022]

# Unit Costs of Malaria Rapid Diagnostic Tests over Time

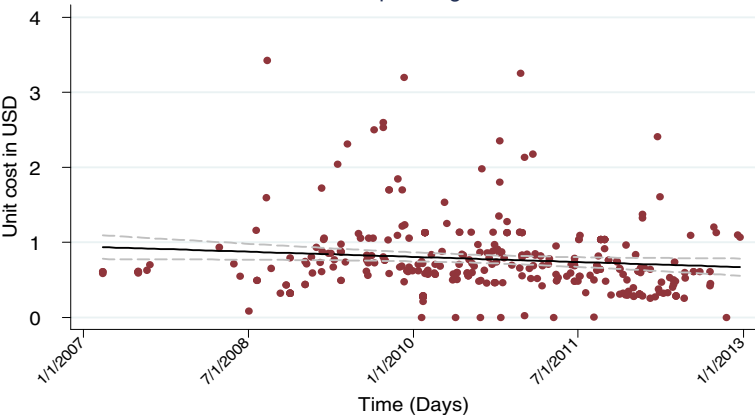

• Unit Cost    - - - - Fitted Trend 95% CI    — Fitted trend

Coef.=-.000 (P=.036)

R-squared=.014
